# Supplementary material for: Age-dependent effects in the transmission and control of COVID-19 epidemics
Source: Springer Nature journal article supplement (doi:10.1038/s41591-020-0962-9), 2020-06-16
Supplement: 41591_2020_962_MOESM1_ESM.pdf [file 41591_2020_962_MOESM1_ESM.pdf]

In the format provided by the authors and unedited.

# Age-dependent effects in the transmission and control of COVID-19 epidemics

Nicholas G. Davies <sup>1</sup>✉, Petra Klepac<sup>1,2</sup>, Yang Liu<sup>1,2</sup>, Kiesha Prem <sup>1</sup>, Mark Jit <sup>1</sup>, CMMID COVID-19 working group and Rosalind M. Eggo <sup>1</sup>✉

---

<sup>1</sup>Department of Infectious Disease Epidemiology, London School of Hygiene & Tropical Medicine, London, UK. <sup>2</sup>These authors contributed equally: Petra Klepac, Yang Liu. ✉e-mail: [nicholas.davies@lshtm.ac.uk](mailto:nicholas.davies@lshtm.ac.uk); [r.eggo@lshtm.ac.uk](mailto:r.eggo@lshtm.ac.uk)

## Age-dependent effects in the transmission and control of COVID-19 epidemics

Authors: Nicholas G. Davies<sup>1\*</sup>, Petra Klepac<sup>1^</sup>, Yang Liu<sup>1^</sup>, Kiesha Prem<sup>1</sup>, Mark Jit<sup>1</sup>, CMMID COVID-19 working group, Rosalind M Eggo<sup>1\*</sup>

The CMMID COVID-19 working group<sup>1</sup> is: Carl A B Pearson, Billy J Quilty, Adam J Kucharski, Hamish Gibbs, Samuel Clifford, Amy Gimma, Kevin van Zandvoort, James D Munday, Charlie Diamond, W John Edmunds, Rein MGJ Houben, Joel Hellewell, Timothy W Russell, Sam Abbott, Sebastian Funk, Nikos I Bosse, Fiona Sun, Stefan Flasche, Alicia Rosello & Christopher I Jarvis. Order of working group determined at random.

<sup>1</sup> Department of Infectious Disease Epidemiology, London School of Hygiene & Tropical Medicine, Keppel Street, WC1E 7HT

<sup>^</sup> these authors contributed equally

\* correspondence to Rosalind M Eggo [r.eggo@lshtm.ac.uk](mailto:r.eggo@lshtm.ac.uk) or Nicholas G Davies [nicholas.davies@lshtm.ac.uk](mailto:nicholas.davies@lshtm.ac.uk)

| Parameter          | Description                                                                | Applies in fits                                               | Value                                                       | Reference                                                    |
|--------------------|----------------------------------------------------------------------------|---------------------------------------------------------------|-------------------------------------------------------------|--------------------------------------------------------------|
| $d_E$              | Incubation period (E to I <sub>P</sub> and E to I <sub>S</sub> ; days)     | All                                                           | $\sim \text{gamma}(\mu = 3.0, k = 4)$                       | Derived from refs. 1,2                                       |
| $d_P$              | Duration of preclinical infectiousness (days)                              | All                                                           | $\sim \text{gamma}(\mu = 2.1, k = 4)$                       | Derived from ref. 2                                          |
| $d_C$              | Duration of clinical infectiousness (I <sub>C</sub> to R; days)            | All                                                           | $\sim \text{gamma}(\mu = 2.9, k = 4)$                       | Ref. 3                                                       |
| $d_S$              | Duration of subclinical infectiousness (days)                              | All                                                           | $\sim \text{gamma}(\mu = 5, k = 4)$                         | Assumed                                                      |
| $u_i$              | Susceptibility for age group $i$                                           | Varies by age in Wuhan hypothesis 2, otherwise all ages equal | Estimated                                                   |                                                              |
| $y_i$              | Probability of clinical infection for age group $i$                        | Varies by age in Wuhan hypothesis 3, otherwise all ages equal | Either fixed (50%) or estimated                             | Ref. 4                                                       |
| $f$                | Relative infectiousness of subclinical cases                               | All                                                           | 50% (0% and 100% in sensitivity analysis)                   | Assumed                                                      |
| $c_{ij}$           | Number of age- $j$ individuals contacted by an age- $i$ individual per day | All                                                           | Country-specific contact matrix.                            | China <sup>5</sup> ; UK <sup>6</sup> ; Zimbabwe <sup>7</sup> |
| $N_i$              | Number of age- $i$ individuals                                             | All                                                           | Demographic data                                            | Ref. 8                                                       |
| $\Delta t$         | Time step for discrete-time simulation                                     | All                                                           | 0.25 days                                                   |                                                              |
| $A_{min}, A_{max}$ | Age range of seed cases                                                    | Wuhan                                                         | Estimated                                                   |                                                              |
| $t_{seed}$         | Day upon which seeding of infections starts                                | All                                                           | Estimated                                                   |                                                              |
| $q_H$              | Relative change in non-school contacts during lunar new year holidays      | Wuhan                                                         | Estimated                                                   |                                                              |
| $q_L$              | Relative change in non-school contacts following large-scale restrictions  | Wuhan, South Korea, Shanghai, Beijing, Italy                  | Estimated                                                   |                                                              |
| $t_L$              | Day upon which large-scale restrictions start                              | Wuhan, South Korea, Shanghai, Beijing, Italy                  | Fixed to January 23 for Wuhan; estimated for other settings |                                                              |

**Supplementary Table 1.** Model parameters.

| Parameter                              | Description                                                            | Prior                                                                                                                                                                                                                                                                                                                                                                                                                                                                                                                                                                                                                                                                                                                                                       |
|----------------------------------------|------------------------------------------------------------------------|-------------------------------------------------------------------------------------------------------------------------------------------------------------------------------------------------------------------------------------------------------------------------------------------------------------------------------------------------------------------------------------------------------------------------------------------------------------------------------------------------------------------------------------------------------------------------------------------------------------------------------------------------------------------------------------------------------------------------------------------------------------|
| $u_i$                                  | Susceptibility to infection upon contact with an infectious person     | <p>Non-age-varying: <math>u_i \sim normal(\mu = 0.1, \sigma = 0.025, min = 0)</math></p> <p>Age-varying: young, middle, and old age fit as<br/> <math>a_y \sim normal(\mu = 15, \sigma = 15, min = 0, max = 30)</math><br/> <math>a_m \sim normal(\mu = 45, \sigma = 15, min = 30, max = 60)</math><br/> <math>a_o \sim normal(\mu = 75, \sigma = 15, min = 60, max = 90)</math></p> <p>Susceptibility for young, middle, and old age fit as<br/> <math>u_y \sim normal(\mu = 0.1, \sigma = 0.025, min = 0)</math><br/> <math>u_m \sim normal(\mu = 0.1, \sigma = 0.025, min = 0)</math><br/> <math>u_o \sim normal(\mu = 0.1, \sigma = 0.025, min = 0)</math></p> <p>Then<br/> <math>u_i = coss(i a_y, b_y, a_m, b_m, a_o, b_o)</math> (see final row)</p> |
| $y_i$                                  | Clinical fraction on infection                                         | <p>Non-age-varying: <math>y_i = 0.5</math></p> <p>Age-varying: young, middle, and old age fit as<br/> <math>a_y \sim normal(\mu = 15, \sigma = 15, min = 0, max = 30)</math><br/> <math>a_m \sim normal(\mu = 45, \sigma = 15, min = 30, max = 60)</math><br/> <math>a_o \sim normal(\mu = 75, \sigma = 15, min = 60, max = 90)</math></p> <p>Susceptibility for young, middle, and old age fit as<br/> <math>y_y \sim normal(\mu = 0.5, \sigma = 0.1, min = 0, max = 0.5)</math><br/> <math>y_m = 0.5</math><br/> <math>y_o \sim normal(\mu = 0.5, \sigma = 0.1, min = 0.5, max = 1)</math></p> <p>Then<br/> <math>y_i = coss(i a_y, y_y, a_m, y_m, a_o, y_o)</math> (see below)</p>                                                                       |
| $t_{seed}$                             | Timing of introduction of cases                                        | $t_{seed} \sim normal(\mu = 15, \sigma = 30, min = 0, max = 30)$                                                                                                                                                                                                                                                                                                                                                                                                                                                                                                                                                                                                                                                                                            |
| $q_H$                                  | Multiplicative factor for transmission during holiday period           | $q_H \sim beta(\alpha = 2, \beta = 2)$ scaled to 0 – 2                                                                                                                                                                                                                                                                                                                                                                                                                                                                                                                                                                                                                                                                                                      |
| $q_L$                                  | Multiplicative factor for transmission during large-scale restrictions | $q_L \sim beta(\alpha = 2, \beta = 2)$                                                                                                                                                                                                                                                                                                                                                                                                                                                                                                                                                                                                                                                                                                                      |
| $A_{min}, A_{max}$                     | Age bounds for introduced cases                                        | $A \sim normal(\mu = 60, \sigma = 20, min = 40, max = 80)$<br>$A_{range} \sim beta(\alpha = 2, \beta = 2)$ scaled to 0 – 10<br>$A_{min} = A - A_{range}$<br>$A_{max} = A + A_{range}$                                                                                                                                                                                                                                                                                                                                                                                                                                                                                                                                                                       |
| $coss(a x_1, y_1, x_2, y_2, x_3, y_3)$ | Cosine-smoothing function                                              | For a given age $a$ (the midpoint age of age group $i$ ) the function evaluates to $y_1$ for $a \leq x_1$ , to $y_2$ for $a = x_2$ , and to $y_3$ for $a \geq x_3$ . Values of $a$ between $x_1$ and $x_2$ are interpolated between $y_1$ and $y_2$ , and values of $a$ between $x_2$ and $x_3$ are interpolated between $y_2$ and $y_3$ , where the interpolation takes the shape of a cosine curve between $-\pi$ and $\pi$ .                                                                                                                                                                                                                                                                                                                             |

Supplementary Table 2. Details of model fitting.

| Location                                                                                                                                                       | Mixing matrix details                                                                                                                                                                                                        |
|----------------------------------------------------------------------------------------------------------------------------------------------------------------|------------------------------------------------------------------------------------------------------------------------------------------------------------------------------------------------------------------------------|
| Wuhan City, China                                                                                                                                              | We used mixing matrices measured in Shanghai in 2017/2018 <sup>5</sup> , adapted to the demographics of Wuhan prefecture. This implicitly assumes that Shanghai mixing patterns are representative of large cities in China. |
| Regions of China: Anhui, Guangdong, Guangxi, Hubei, Hunan, Jiangsu, Jiangxi, Jilin Shaanxi, Shandong, Sichuan, Tianjin, Zhejiang provinces; Beijing, Shanghai. | We used mixing matrices measured in Shanghai in 2017/2018 <sup>5</sup> , adapted to the demographics of each province / city.                                                                                                |
| Regions of Italy: Lombardia, Piemonte, Trento Veneto, Friuli Venezia Giulia, Liguria, Emilia-Romagna, Toscana, Marche, Lazio, Campania, Puglia regions; Milan. | We used mixing matrices measured in Italy in 2005/2006 <sup>6</sup> , adapted to the demographics of each region / city. This assumes that these contact patterns will still be representative of contact patterns in 2020.  |
| Ontario, Canada                                                                                                                                                | We used synthetic contact matrices, generated based on demographic information about the country <sup>9</sup> .                                                                                                              |
| Japan                                                                                                                                                          | We used synthetic contact matrices, generated based on demographic information about the country <sup>9</sup> .                                                                                                              |
| Singapore                                                                                                                                                      | We used synthetic contact matrices based on demographic information about the country <sup>9</sup> .                                                                                                                         |
| South Korea                                                                                                                                                    | We used synthetic contact matrices based on demographic information about the country <sup>9</sup> .                                                                                                                         |
| Birmingham, UK                                                                                                                                                 | We used mixing matrices measured in the UK in 2005/2006 <sup>6</sup> , adapted to the demographics of Birmingham. This assumes that these contact patterns will still be representative of contact patterns in 2020.         |
| Bulawayo, Zimbabwe                                                                                                                                             | We used mixing matrices measured in Manicaland, Zimbabwe in 2013 <sup>7</sup> , adapted to the demographics of Bulawayo. This implicitly assumes that Manicaland mixing patterns are representative of Bulawayo.             |
| 146 capital cities                                                                                                                                             | We used synthetic contact matrices, generated based on demographic information about each country <sup>9</sup> .                                                                                                             |

**Supplementary Table 3.** Details on mixing matrices used in the study.

|                   |       |                  |
|-------------------|-------|------------------|
| Wuhan: Model 1    |       |                  |
| age_y             | 6     | (4.2-7.2)        |
| age_m             | 55    | (46-60)          |
| age_o             | 64    | (60-68)          |
| susc_y            | 0.003 | (0.00014-0.0076) |
| susc_m            | 0.044 | (0.032-0.054)    |
| susc_o            | 0.084 | (0.079-0.09)     |
| seed_start        | 19    | (16-22)          |
| seed_age          | 61    | (42-79)          |
| seed_age_range    | 4.9   | (1.5-8.9)        |
| qH                | 1.4   | (1.3-1.5)        |
| qL                | 0.41  | (0.3-0.56)       |
| Wuhan: Model 2    |       |                  |
| age_y             | 19    | (14-29)          |
| age_m             | 50    | (40-60)          |
| age_o             | 68    | (60-79)          |
| susc              | 0.055 | (0.052-0.059)    |
| symp_y            | 0.037 | (0.0051-0.062)   |
| symp_m            | 0.3   | (0.19-0.42)      |
| symp_o            | 0.65  | (0.52-0.77)      |
| seed_start        | 16    | (14-20)          |
| seed_age          | 46    | (30-67)          |
| seed_age_range    | 1.3   | (0.5-1.9)        |
| qH                | 1.3   | (1.2-1.4)        |
| qL                | 0.43  | (0.31-0.56)      |
| Wuhan: Model 3    |       |                  |
| susc              | 0.046 | (0.045-0.048)    |
| seed_start        | 20    | (17-21)          |
| seed_age          | 64    | (37-80)          |
| seed_age_range    | 4.2   | (0.93-8.7)       |
| qH                | 1.4   | (1.3-1.5)        |
| qL                | 0.33  | (0.21-0.42)      |
| Beijing, Shanghai |       |                  |
| susc              | 0.074 | (0.055-0.1)      |
| B_seed_t0         | 20    | (15-25)          |
| S_seed_t0         | 21    | (16-26)          |
| seed_d            | 3.8   | (1.4-6.2)        |
| lockdown_t        | 54    | (53-56)          |
| qH                | 1.2   | (0.71-1.7)       |
| qL                | 0.16  | (0.11-0.22)      |
|                   | 0.074 | (0.055-0.1)      |
| South Korea       |       |                  |
| susc              | 0.099 | (0.089-0.11)     |
| seed_t0           | 8.3   | (5-12)           |
| seed_d            | 3.3   | (0.79-6.2)       |
| lockdown_t        | 53    | (52-54)          |
| qL                | 0.047 | (0.0041-0.095)   |
| Lombardy          |       |                  |
| susc              | 0.084 | (0.075-0.096)    |
| conf_mean         | 7.6   | (2.7-13)         |
| conf_shape        | 11    | (3.7-20)         |
| onset_known       | 0.36  | (0.061-0.62)     |
| seed_t0           | 15    | (11-20)          |
| seed_d            | 3.6   | (0.83-6.3)       |
| lockdown_t        | 50    | (47-54)          |
| qL                | 0.48  | (0.28-0.72)      |

**Supplementary Table 4.** Posterior means and 95% HDIs from fitting the dynamic transmission model (Figs. 1 and 2, main text).

## Supplementary references

1. Lauer, S. A. et al. The Incubation Period of Coronavirus Disease 2019 (COVID-19) From Publicly Reported Confirmed Cases: Estimation and Application. *Ann. Intern. Med.* (2020) doi:10.7326/M20-0504.
2. Backer, J. A., Klinkenberg, D. & Wallinga, J. Incubation period of 2019 novel coronavirus (2019-nCoV) infections among travellers from Wuhan, China, 20–28 January 2020. *Eurosurveillance* 25, (2020).
3. Kucharski, A. J. et al. Early dynamics of transmission and control of COVID-19: a mathematical modelling study. *Lancet Infect. Dis.* S1473309920301444 (2020) doi:10.1016/S1473-3099(20)30144-4.
4. Nishiura, H. et al. The Rate of Underascertainment of Novel Coronavirus (2019-nCoV) Infection: Estimation Using Japanese Passengers Data on Evacuation Flights. *J. Clin. Med.* 9, 419 (2020).
5. Zhang, J. et al. Patterns of human social contact and contact with animals in Shanghai, China. *Sci. Rep.* 9, 1–11 (2019).
6. Mossong, J. et al. Social Contacts and Mixing Patterns Relevant to the Spread of Infectious Diseases. *PLOS Med.* 5, e74 (2008).
7. Melegaro, A. et al. Social Contact Structures and Time Use Patterns in the Manicaland Province of Zimbabwe. *PLOS ONE* 12, e0170459 (2017).
8. World Population Prospects - Population Division - United Nations. <https://population.un.org/wpp/>.
9. Prem, K., Cook, A. R. & Jit, M. Projecting social contact matrices in 152 countries using contact surveys and demographic data. *PLOS Comput. Biol.* 13, e1005697 (2017).
